# Supplementary material for: Does the Application of Tecar Therapy Affect Temperature and Perfusion of Skin and Muscle Microcirculation? A Pilot Feasibility Study on Healthy Subjects
Source: PubMed Central journal article supplement (PMC7044785; doi:10.1089/acm.2019.0165), 2020-02-04
Supplement: Supp_Table1.pdf [file Supp_Table1.pdf]

## Supplementary Data

SUPPLEMENTARY TABLE S1. PRE- AND POSTABSOLUTE VALUES OF THE SELECTED OUTCOME MEASUREMENTS

| <i>Outcomes</i>                       | <i>Placebo</i> | <i>Capacitive</i> | <i>Resistive</i> |
|---------------------------------------|----------------|-------------------|------------------|
| IMBF, distal (%)                      |                |                   |                  |
| Preintervention values                | 0.80 (0.73)    | 2.88 (2.59)       | 2.83 (1.44)      |
| Post 1 values                         | 0.72 (0.72)    | 2.80 (2.33)       | 4.03 (2.30)      |
| Post 2 values                         | 0.68 (1.85)    | 3.15 (2.07)       | 4.38 (2.39)      |
| Post 3 values                         | 0.92 (1.37)    | 3.07 (1.66)       | 5.44 (2.74)      |
| IMBF, proximal (%)                    |                |                   |                  |
| Preintervention values                | 3.01 (6.48)    | 6.34 (4.06)       | 6.62 (8.67)      |
| Post 1 values                         | 2.60 (7.12)    | 7.29 (10.3)       | 8.97 (8.23)      |
| Post 2 values                         | 2.91 (9.14)    | 9.00 (8.39)       | 10.37 (8.43)     |
| Post 3 values                         | 2.95 (7.32)    | 8.30 (8.64)       | 9.57 (7.76)      |
| Skin perfusion (arbitrary units) PSMC |                |                   |                  |
| Preintervention values                | 47.29 (13.99)  | 47.88 (10.22)     | 49.10 (9.51)     |
| Postvalues                            | 36.69 (10.14)  | 48.22 (10.38)     | 66.38 (22.14)    |
| Heart rate (bpm)                      |                |                   |                  |
| Preintervention values                | 63 (13)        | 61 (9)            | 61 (11)          |
| Postvalues                            | 65 (9)         | 63 (8)            | 61 (4)           |
| Mean arterial pressure (mmHg)         |                |                   |                  |
| Preintervention values                | 95 (9.8)       | 87.8 (14.1)       | 87.5 (15)        |
| Postvalues                            | 91 (11.9)      | 88.5 (9.92)       | 89.5 (14.67)     |
| Skin temperature (°)                  |                |                   |                  |
| Preintervention values                | 33.3 (0.9)     | 33.2 (1.1)        | 33.3 (1.2)       |
| Postvalues                            | 30.5 (1.3)     | 34.6 (1.2)        | 35.9 (2.3)       |

All values are reported as median and IQR.

IMBF, intramuscular blood flow; IQR, interquartile range; PSMC, perfusion of the skin microcirculation.
